# Supplementary material for: Targeting Nucleotide Binding Domain of Multidrug Resistance-associated Protein-1 (MRP1) for the Reversal of Multi Drug Resistance in Cancer
Source: PubMed Central journal article supplement (PMC6086895; doi:10.1038/s41598-018-30420-x), 2018-08-10
Supplement: 41598_2018_30420_MOESM1_ESM.pdf [file 41598_2018_30420_MOESM1_ESM.pdf]

**Targeting Nucleotide Binding Domain of Multidrug Resistance-associated Protein-1 (MRP1) for the Reversal of Multi Drug Resistance in Cancer**

**Divya Dhasmana<sup>1#</sup>, Ashutosh Singh<sup>1#</sup>, Rohit Shukla<sup>2</sup>, Timir Tripathi<sup>2</sup>, Neha Garg<sup>1\*</sup>**

<sup>1</sup> School of Basic Science, Indian Institute of Technology Mandi, Himachal Pradesh, India;

<sup>2</sup>Molecular and Structural Biophysics Laboratory, Department of Biochemistry, North Eastern Hill University, Shillong, India

<sup>#</sup>Equal Contribution

\* Corresponding Author: N.G. (Email: [neha@iitmandi.ac.in](mailto:neha@iitmandi.ac.in))

**Supplementary Table S1. XP docking results of selected compounds.**

| <b>Compound</b> | <b>Generic name</b>             | <b>Docking Score (Kcal/mol)</b> | <b>Glide Score (Kcal/mol)</b> |
|-----------------|---------------------------------|---------------------------------|-------------------------------|
| DB09125         | Potassium Citrate               | -16.795                         | -16.795                       |
| DB09154         | Sodium Citrate                  | -16.795                         | -16.795                       |
| DB11093         | Calcium Citrate                 | -16.795                         | -16.795                       |
| DB06784         | Gallium citrate Ga 67           | -16.481                         | -16.481                       |
| DB09162         | Ferric Citrate                  | -16.481                         | -16.481                       |
| DB09147         | Ferric pyrophosphate            | -15.892                         | -15.892                       |
| DB09165         | Technetium Tc-99m pyrophosphate | -15.784                         | -15.784                       |
| DB00326         | Calcium Gluceptate              | -15.175                         | -15.175                       |
| DB09275         | Bismuth Subcitrate              | -13.597                         | -13.597                       |
| DB11126         | Calcium gluconate               | -13.069                         | -13.069                       |
| DB09138         | Technetium Tc-99m medronate     | -13.059                         | -13.059                       |
| DB09561         | Sodium glycerophosphate         | -12.723                         | -12.723                       |
| DB09425         | Indium In-111 pentetate         | -12.652                         | -12.652                       |
| DB09221         | Polaprezinc                     | -12.494                         | -12.494                       |
| DB05273         | Samarium (153Sm) lexidronam     | -12.434                         | -12.434                       |
| DB00789         | Gadopentetatedimeglumine        | -12.095                         | -12.095                       |

**Supplementary Table S2. Table showing details of compounds that demonstrated maximum number of interactions with the target residues.**

| Compound ID | Generic name                | Total no. of interactions                                                         | Target residues interacting with the ligand |
|-------------|-----------------------------|-----------------------------------------------------------------------------------|---------------------------------------------|
| DB09125     | Potassium citrate           | H-bonds: Gly683,Gly681, Ser686, Gln713<br>salt bridge: Lys684                     | Gly681, Lys684, Ser686, Gln713              |
| DB09138     | Technetium Tc-99m medronate | H-bonds: Ser685, Gln713<br>Salt bridges(2):Lys684                                 | Lys684, Ser685, Gln713                      |
| DB09221     | Polaprezinc                 | 4 H-bonds: Gly683, Ser685, Ser686 (2)<br>salt bridge: Lys684<br>pi-cation: Lys684 | Lys684, Ser685, Ser686                      |
| DB05273     | Samarium (153Sm) lexidronam | H-bonds: Gly681, Lys684(2), Ser685<br>salt bridge: Lys684                         | Gly681, Lys684, Ser685                      |

**Supplementary Table S3. Table showing percentage occupancy of hydrogen bonds between protein and ligand.**

| Donor                                   | Acceptor      | Occupancy |
|-----------------------------------------|---------------|-----------|
| <b>NBD1-POTASSIUM CITRATE</b>           |               |           |
| LIG2-872-Side                           | CYS682-Main   | 1.40%     |
| SER686-Side                             | LIG2-872-Side | 0.17%     |
| CYS682-Main                             | LIG2-872-Side | 0.17%     |
| LIG2-872-Side                           | SER686-Side   | 0.17%     |
| LIG2-872-Side                           | GLY843-Main   | 0.27%     |
| LIG2-872-Side                           | THR660-Main   | 0.07%     |
| VAL680-Main                             | LIG2-872-Side | 0.73%     |
| GLY844-Main                             | LIG2-872-Side | 0.03%     |
| GLY843-Main                             | LIG2-872-Side | 0.67%     |
| LIG2-872-Side                           | MET841-Side   | 0.17%     |
| LIG2-872-Side                           | VAL676-Main   | 0.33%     |
| GLY683-Main                             | LIG2-872-Side | 0.20%     |
| CYS682-Side                             | LIG2-872-Side | 0.03%     |
| LIG2-872-Side                           | GLY683-Main   | 0.03%     |
| LEU687-Main                             | LIG2-872-Side | 0.07%     |
| <b>NBD1-technetium Tc-99m medronate</b> |               |           |
| CYS682-Side                             | LIG12--Side   | 0.60%     |
| THR660-Side                             | LIG12--Side   | 0.13%     |
| LIG12--Side                             | THR660-Main   | 0.17%     |
| TRP653-Side                             | LIG12--Side   | 0.20%     |
| LIG12--Side                             | PRO659-Main   | 0.03%     |
| LIG12--Side                             | SER685-Side   | 0.07%     |
| LIG12--Side                             | GLY843-Main   | 0.03%     |
| LIG12--Side                             | CYS682-Side   | 0.03%     |
| LIG12--Side                             | SER689-Side   | 0.07%     |
| ASN662-Main                             | LIG12--Side   | 0.17%     |
| SER686-Side                             | LIG12--Side   | 0.03%     |
| GLY844-Main                             | LIG12--Side   | 0.03%     |

|             |             |       |
|-------------|-------------|-------|
| MET849-Main | LIG12--Side | 0.03% |
| ILE846-Main | LIG12--Side | 0.03% |
| THR665-Main | LIG12--Side | 0.37% |
| LIG12--Side | THR665-Main | 0.10% |
| LIG12--Side | SER847-Main | 0.03% |
| SER667-Main | LIG12--Side | 0.37% |
| LIG12--Side | SER667-Main | 0.03% |

**Supplementary Table S4. Table showing the Van der Waals, electrostatic, polar salvation, SASA and binding energy in kJ mol<sup>-1</sup> for NBD1-POTASSIUM CITRATE and NBD1-technetium Tc-99m medronate complexes.**

| S. No. | Compound                         | Van der Waals energy | Electrostatic energy | Polar salvation energy | SASA energy   | Binding energy |
|--------|----------------------------------|----------------------|----------------------|------------------------|---------------|----------------|
| 1.     | NBD1-potassium citrate           | -130.64 ± 9.08       | 18.74 ± 6.62         | 74.63 ± 8.54           | -10.56 ± 0.55 | -85.31 ± 10.37 |
| 2.     | NBD1-technetium Tc-99m medronate | -68.41 ± 10.31       | -2.88 ± 8.22         | 28.37 ± 9.08           | -8.61 ± 1.18  | -51.53 ± 10.02 |
